# Supplementary material for: Lifestyle Habits and Exposure to BPA and Phthalates in Women of Childbearing Age from Northern Italy: A Pilot Study
Source: MDPI journal article supplement (doi:10.3390/ijerph18189710), 2021-09-15
Supplement: s1 [file s1]

**Table S1.** Urinary unadjusted concentrations of BPA and phthalates from literature in childbearing age women, either non-pregnant [59, 60, 63, 64] or pregnant [59, 62].

| <i>BPA (µg/l)</i>                       | <i>MEP (ng/ml)</i>                           | <i>MibP (ng/ml)</i>                     | <i>MEHHP (ng/ml)</i>                      | <i>MEHP (ng/ml)</i>                     | <i>MBzP (ng/ml)</i>                     |
|-----------------------------------------|----------------------------------------------|-----------------------------------------|-------------------------------------------|-----------------------------------------|-----------------------------------------|
| Median [95%CI]                          | Median [Q1, Q3]<br>or <b>GM [95%CI]</b>      | Median [Q1, Q3]<br>or <b>GM [95%CI]</b> | Median [Q1, Q3]<br>or <b>GM [95%CI]</b>   | Median [Q1, Q3]<br>or <b>GM [95%CI]</b> | Median [Q1, Q3]<br>or <b>GM [95%CI]</b> |
| <b>1.91</b><br><b>[1.3-2.5]</b><br>[63] | <b>138</b><br><b>[108-176]</b><br>[59]       | <b>9.3</b><br><b>[8.3-10.5]</b><br>[62] | <b>23</b><br><b>[20.1-26.3]</b><br>[62]   | <b>5.1</b><br><b>[4.3-6]</b><br>[62]    | <b>9.3</b><br><b>[8.3-10.5]</b><br>[62] |
|                                         | 47.1<br>[20, 132]<br>[60]                    | <b>2.3</b><br><b>[1.92-2.8]</b><br>[59] | <b>22.1</b><br><b>[18.8-26]</b><br>[59]   | <b>6.6</b><br><b>[5.7-7.5]</b><br>[59]  | <b>3.5</b><br><b>[2.9-4.3]</b><br>[59]  |
|                                         | <b>152.9</b><br><b>[135.7-172.3]</b><br>[64] | 19.7<br>[12, 34]<br>[60]                | <b>22.9</b><br><b>[20.3-25.9]</b><br>[64] | 2.07<br>[1.0, 3.7]<br>[60]              | 5.84<br>[3.3, 11]<br>[60]               |
|                                         |                                              | <b>4.3</b><br><b>[4.0-4.7]</b><br>[64]  | 9.12<br>[6.2, 14]<br>[60]                 | <b>3.5</b><br><b>[3.2-3.9]</b><br>[64]  | <b>9.8</b><br><b>[8.9-10.8]</b><br>[64] |

**Legend.** In bold GM (Geometric Mean) and 95%CI (95% Confidence Interval).
